# Supplementary material for: Polysaccharides isolated fromNostoc communeVaucher inhibit colitis-associated colon tumorigenesis in mice and modulate gut microbiota
Source: Royal Society of Chemistry journal article supplement (doi:10.1039/c9fo00296k), 2019-01-01
Supplement: c9fo00296k1.pdf [file c9fo00296k1.pdf]

1

## Supplementary Figures

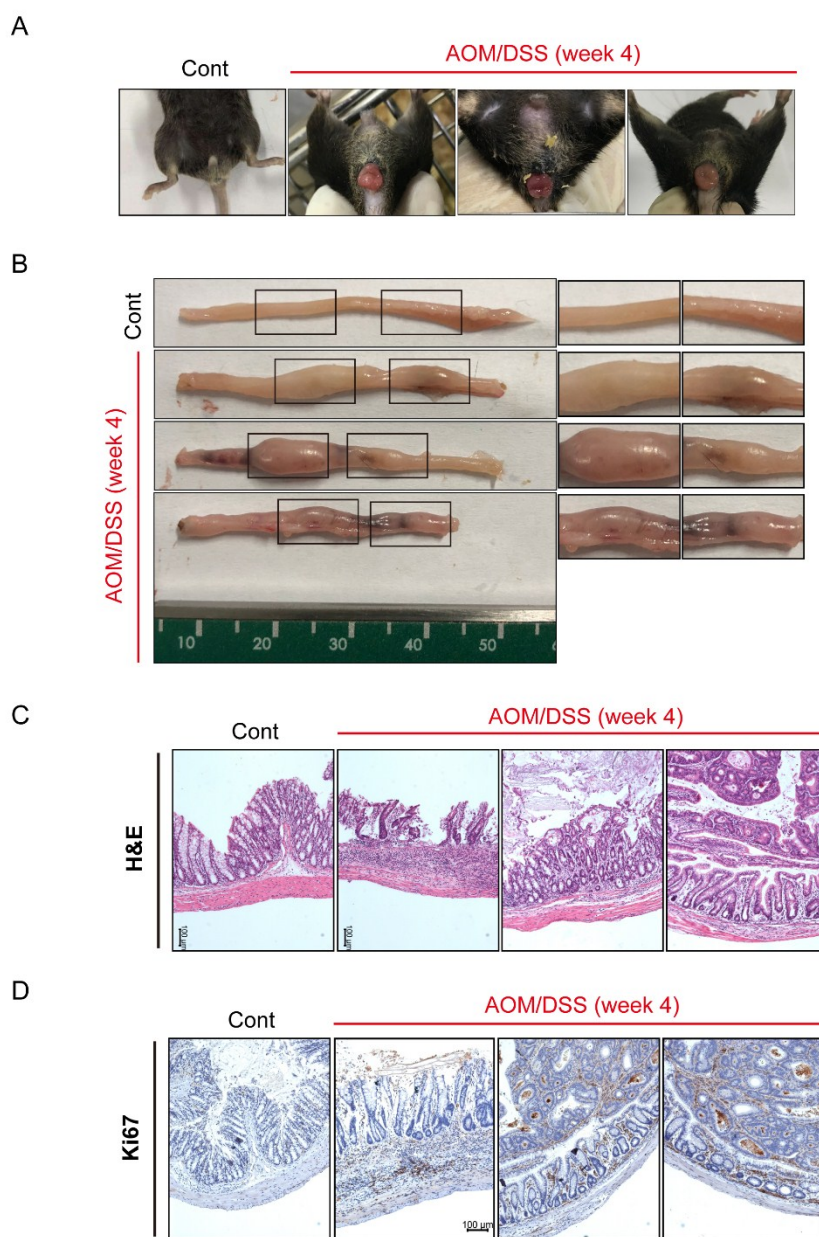

2

3

4

5

Supplementary Figure S1

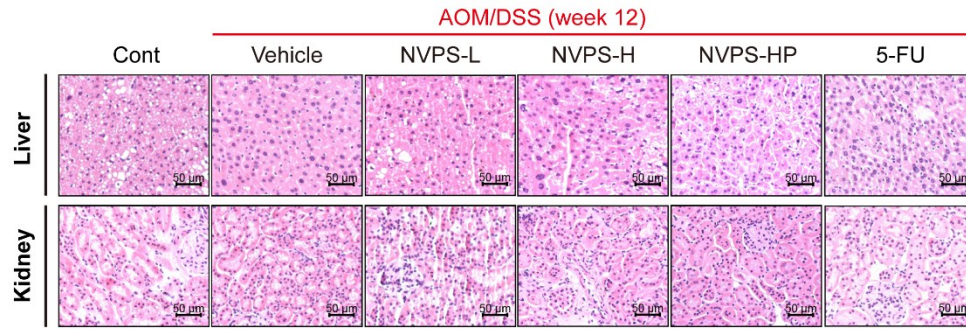

6

7

Supplementary Figure S2

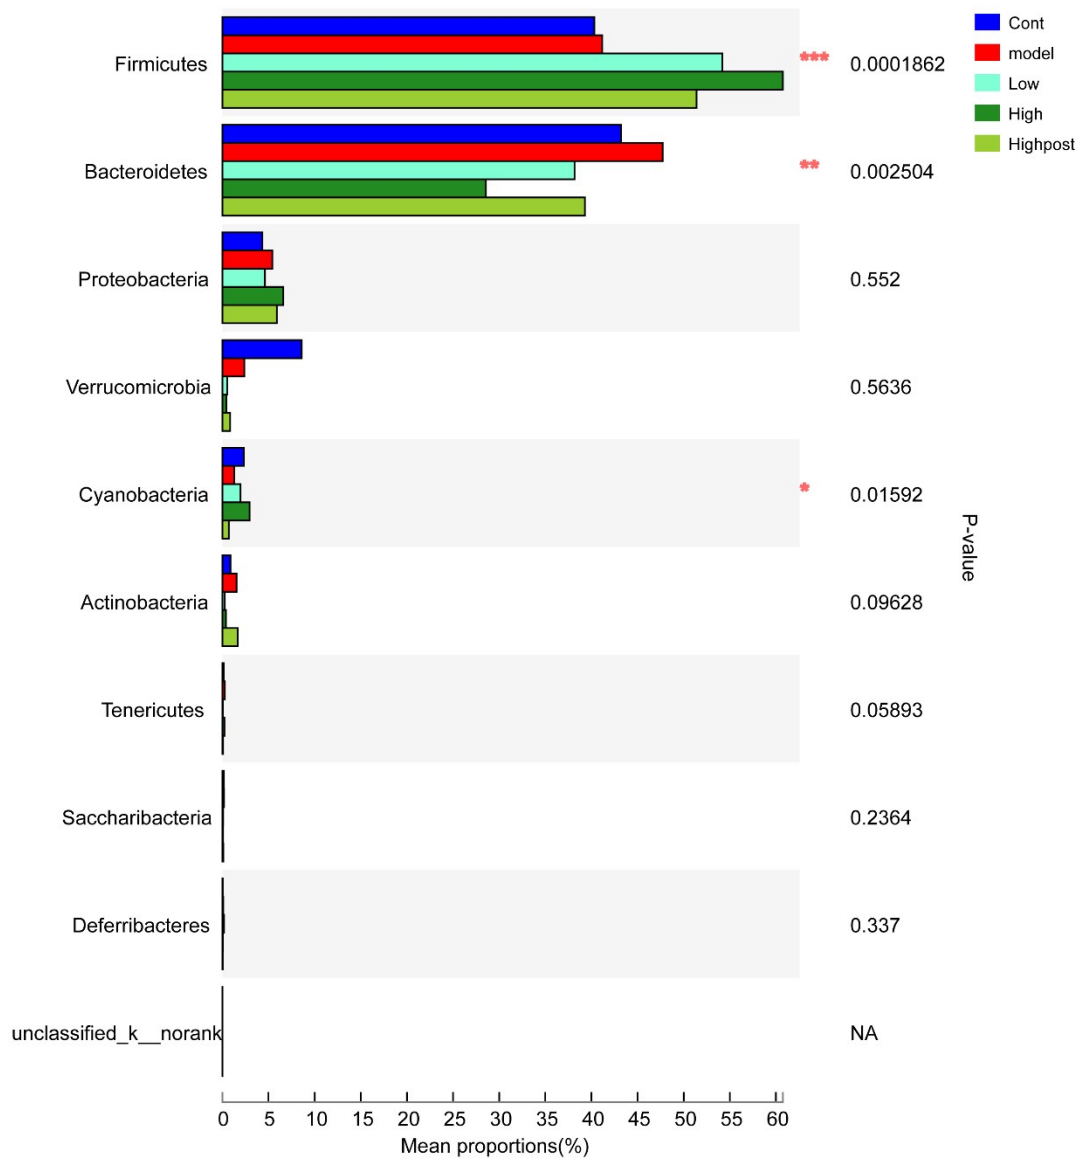

8

9

Supplementary Figure S3

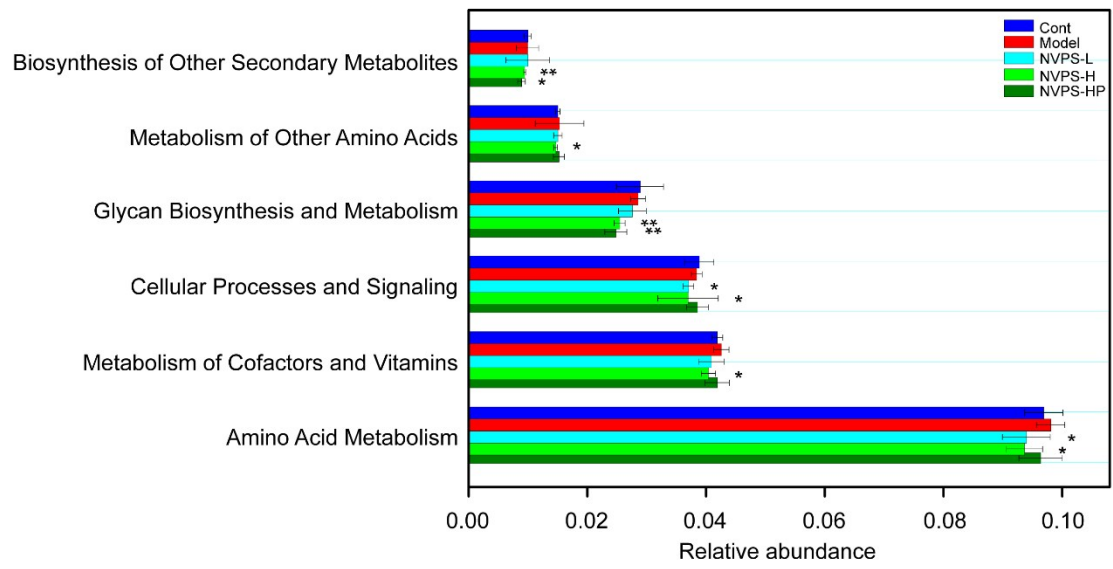

Supplementary Figure S4

Supplementary Table 1 Diversity indices of all groups

| <b>Samples</b> | <b>OTU</b> | <b>Ace</b> | <b>Chao</b> | <b>Shannon</b> | <b>Simpson</b> | <b>Coverage</b> |
|----------------|------------|------------|-------------|----------------|----------------|-----------------|
| Cont           |            | 439.9 ±    | 448.37 ±    | 4.2567 ±       | 0.049293 ±     | 0.99415 ±       |
|                | 575        | 40.368     | 37.634      | 0.47402        | 0.041117       | 0.00034765      |
| Model          |            | 480.88 ±   | 482.84 ±    | 4.543 ±        | 0.025494 ±     | 0.99386 ±       |
|                | 625        | 44.378     | 50.235      | 0.15183        | 0.005312       | 0.00035575      |
| NVPS-L         |            | 462.47 ±   | 465.41 ±    | 4.2445 ±       | 0.048766 ±     | 0.99383±        |
|                | 593        | 23.636     | 24.08       | 0.25891*       | 0.03144        | 0.0005996       |
| NVPS-H         |            | 437.78 ±   | 440.75 ±    | 4.3259 ±       | 0.031558 ±     | 0.99407 ±       |
|                | 564        | 15.522*    | 33.019      | 0.10175*       | 0.00686        | 0.00053078      |
| NVPS-HP        |            | 465.28 ±   | 468.18 ±    | 4.1608 ±       | 0.044556 ±     | 0.99335 ±       |
|                | 617        | 33.369     | 39.2        | 0.43116        | 0.021965       | 0.0012127       |

\* $P < 0.05$  vs group Model.
